# Supplementary material
Source: Springer Nature journal article supplement (https://www.springerprofessional.de/resource/supplementary/40192_2013_10_MOESM1_ESM.pdf/11899508)

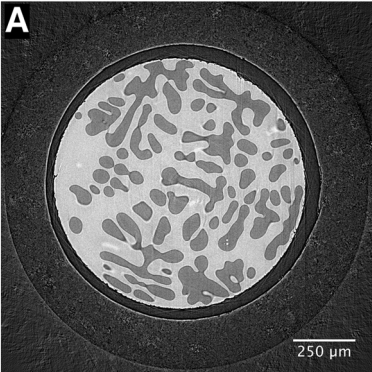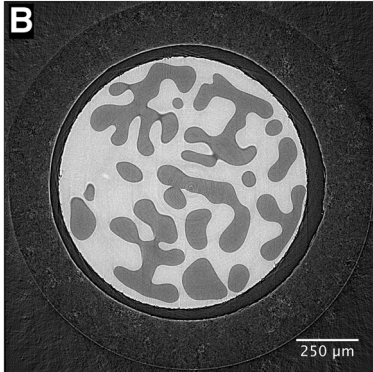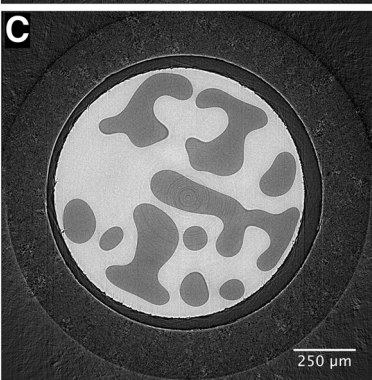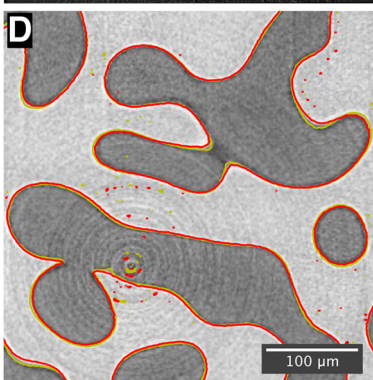

Supplement: MOESM1 [file 11899508]
